# Supplementary material for: Pharmacological properties of TRPM3 isoforms are determined by the length of the pore loop
Source: PubMed Central journal article supplement — Br J Pharmacol. 2020 Aug 28;179(14):3560–75. doi: 10.1111/bph.15223 (PMC9290681; doi:10.1111/bph.15223), 2020-08-28
Supplement: BPH-179-3560-s001.pdf [file BPH-179-3560-s001.pdf]

1  
2  
3  
4  
5  
6  
7  
8  
9  
10  
11  
12  
13  
14  
15  
16  
17  
18  
19  
20

**Pharmacological properties of TRPM3 isoforms are determined by the length of the pore  
loop**

SUPPLEMENTARY INFORMATION

Katharina Held<sup>1,2,3</sup>, Vincenzo Davide Aloï<sup>1,2</sup>, Ana Cristina Nogueira Freitas<sup>2</sup>, Annelies Janssens<sup>2</sup>,  
Andrei Segal<sup>2</sup>, Julia Przibilla<sup>4</sup>, Stephan Ernst Philipp<sup>4</sup>, Yu Tian Wang<sup>3</sup>, Thomas Voets<sup>2</sup> and Joris  
Vriens<sup>1, #</sup>

**Author affiliations:**

<sup>1</sup>Laboratory of Endometrium, Endometriosis and Reproductive Medicine, Department of  
Development and Regeneration, KU Leuven, Belgium

<sup>2</sup>Laboratory of Ion Channel Research, VIB-KU Leuven Center for Brain and Disease Research,  
and KU Leuven Department of Molecular Medicine, Leuven, Belgium

<sup>3</sup>DM Centre for Brain Health, Department of Medicine, UBC, Canada

<sup>4</sup>Experimental and Clinical Pharmacology and Toxicology / Center for Molecular Signaling  
(PZMS), Saarland University, Homburg, Germany.

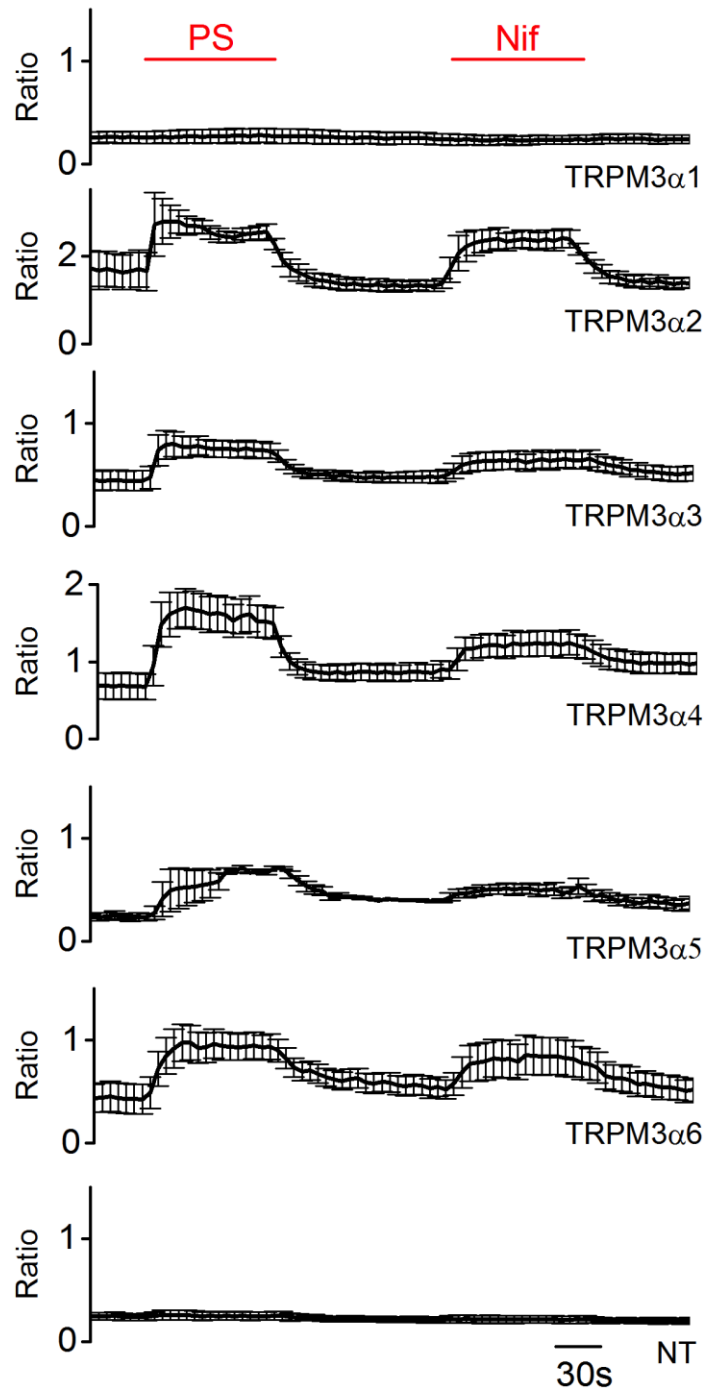

21

22 **FIGURE S1**

23 Mean fluorescence ratio (Fura<sub>340</sub>/Fura<sub>380</sub>) of HEK293T cells transfected with TRPM3α1 - α6 or  
 24 of non-transfected cells during treatment with PS (40 μM) and Nif (50 μM) (N = 3 cover slips  
 25 for each experiment).

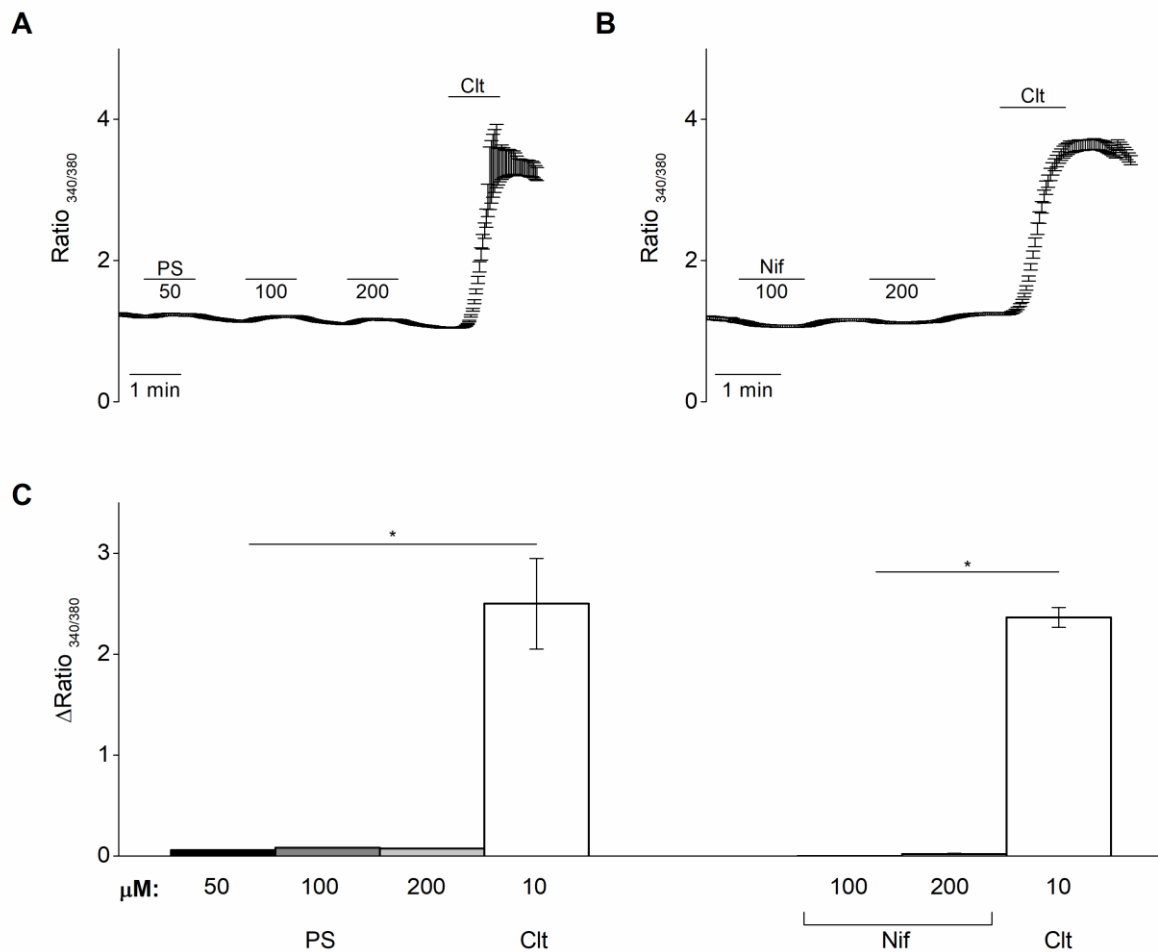

26

27 **FIGURE S2**

28 **A)** Time course of calcium fluorimetric measurements in HEK293T cells transiently expressing  
 29 TRPM3 $\alpha$ 1 upon application of different concentrations of PS (50, 100 and 200  $\mu$ M) and Clt  
 30 (10  $\mu$ M). **B)** As in *A*) during application of different concentrations of Nif (100 and 200  $\mu$ M)  
 31 and Clt (10  $\mu$ M). **C)** Statistics of calcium increases that occur during the different treatments  
 32 in *A*) and *B*) with  $n = 366$  for PS treatment and  $n = 393$  for Nif treatment with  $N = 3$  cover slips  
 33 for both experiments. \*  $< 0.05$  with Kruskal-Wallis ANOVA.

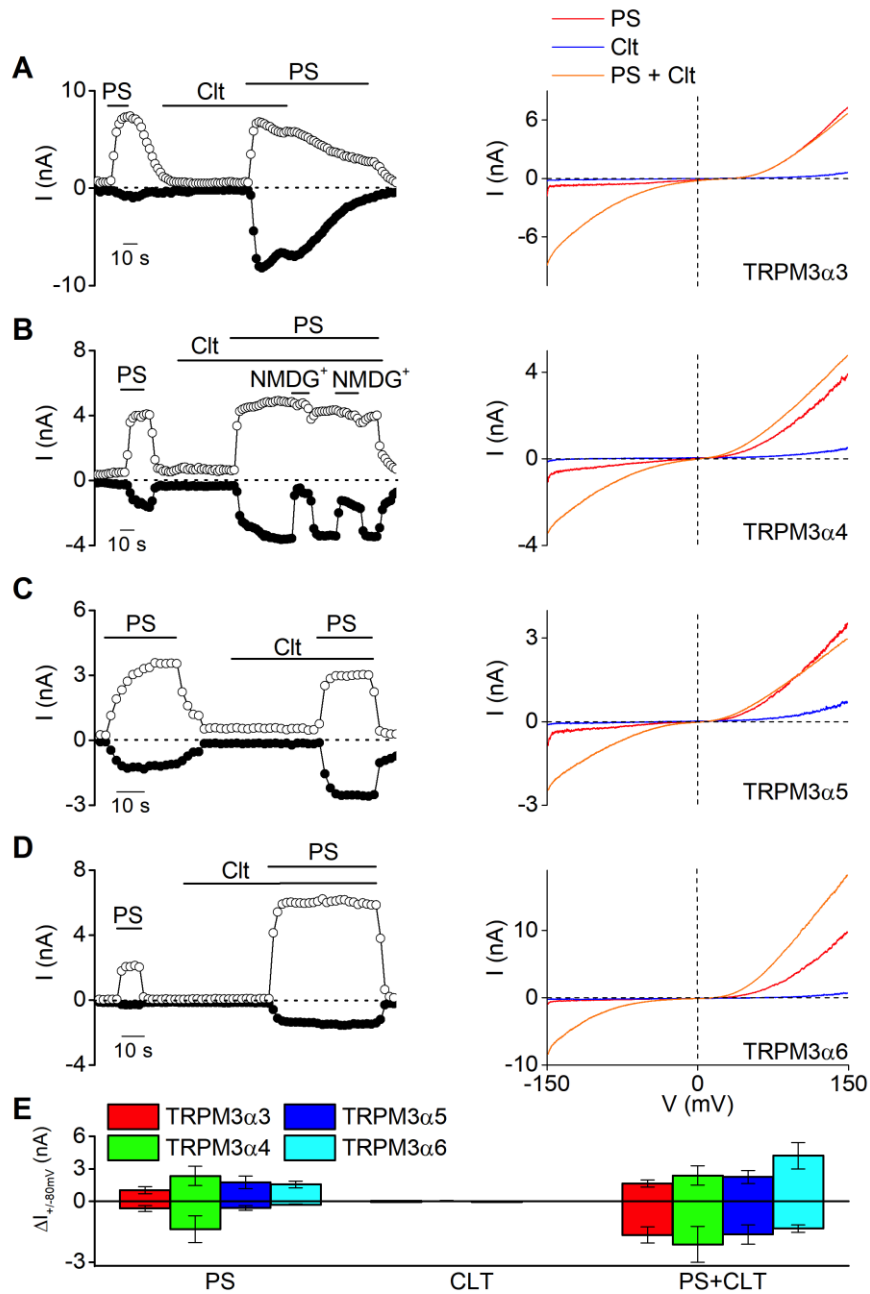

34

35 **FIGURE S3**

36 **A - D)** Time courses and corresponding *I-V* curves of whole-cell currents recorded in  
 37 HEK293T cells transiently transfected with A) TRPM $\alpha$ 3, B) TRPM $\alpha$ 4, C) TRPM $\alpha$ 5, D) TRPM $\alpha$ 6  
 38 during treatment with PS and Clt. **E)** Current increases of the different TRPM3 $\alpha$  variants at  $\pm$   
 39 80 mV upon chemical treatment as shown in B) – E) (n = 5 for TRPM3 $\alpha$ 3, n = 3 for TRPM3 $\alpha$ 4  
 40 and n = 5 for TRPM3 $\alpha$ 5 and n = 4 for TRPM3 $\alpha$ 6).

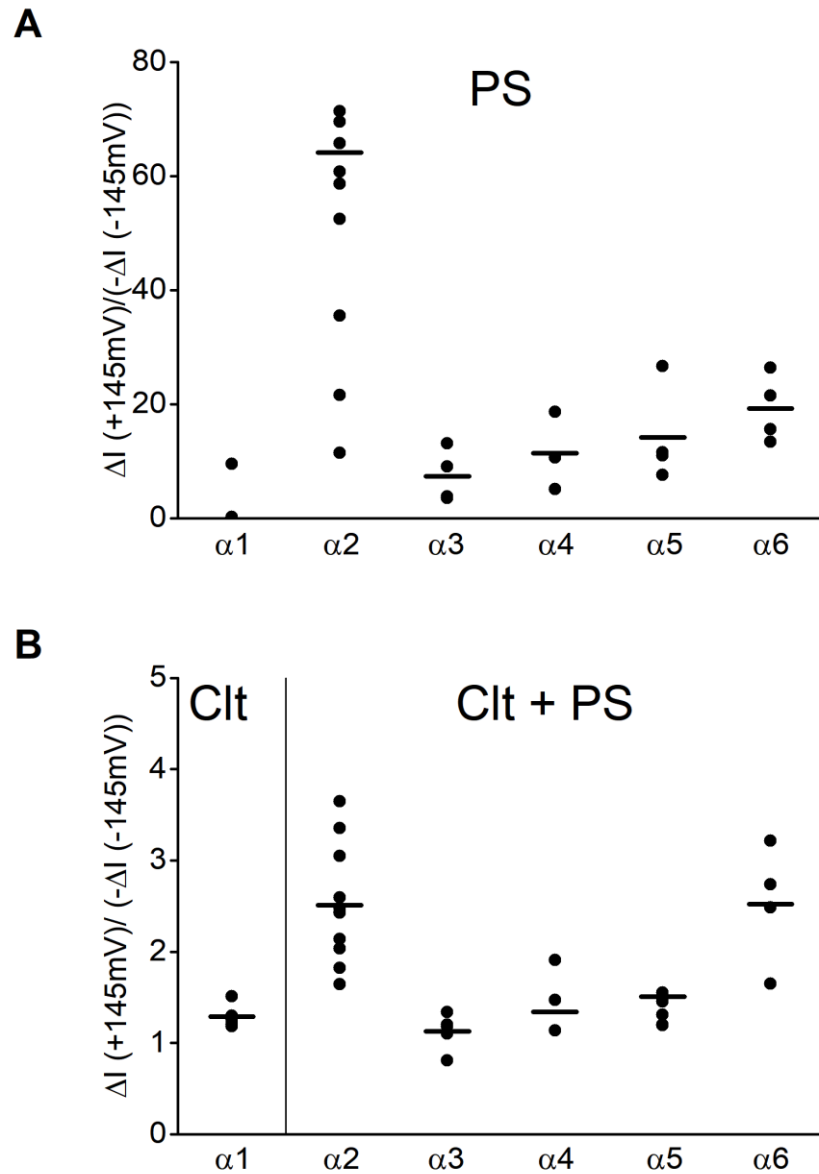

41

42 **FIGURE S4**

43 **A)** Current ratios for HEK293 cells expressing the different TRPM3 $\alpha$  isoforms calculated for  
 44 values at  $\pm 145$  mV during application of PS (40  $\mu$ M). **B)** Current ratios at  $\pm 145$  mV for  
 45 TRPM3 $\alpha 1$  and TRPM3 $\alpha 2$  during Clt (10  $\mu$ M) application and for TRPM3 $\alpha 2$ -  $\alpha 6$  during PS (40  
 46  $\mu$ M) + Clt (10  $\mu$ M) co-application. For both graphs: n = 5 for TRPM3 $\alpha 1$ , n = 11 for TRPM3 $\alpha 2$ ,  
 47 n = 5 for TRPM3 $\alpha 3$ , n = 3 for TRPM3 $\alpha 4$  and n = 5 for TRPM3 $\alpha 5$  and n = 4 for TRPM3 $\alpha 6$ )

48

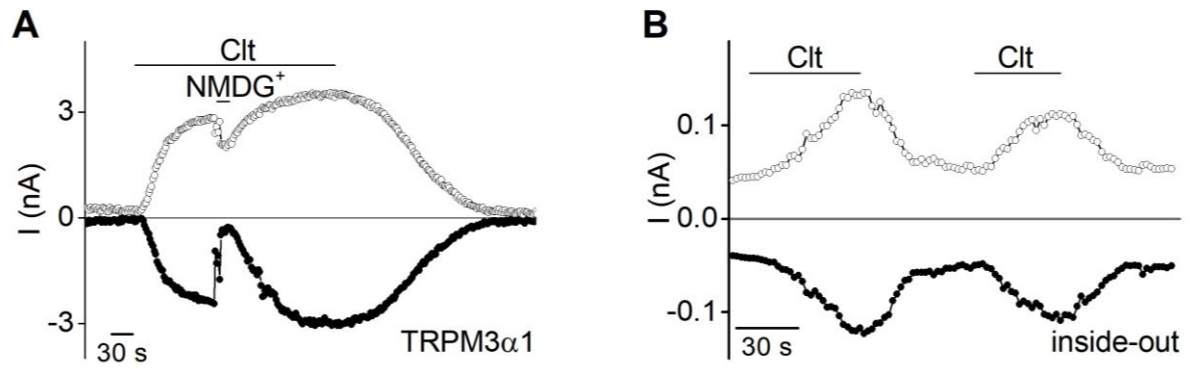

49

50 **FIGURE S5**

51 **A)** Time course of whole-cell patch clamp recording in HEK293T cells transiently transfected  
 52 with TRPM3 $\alpha$ 1 upon application of Clt (10  $\mu$ M). At the indicated time points all monovalent  
 53 ions in the extracellular solution were replaced by NMDG $^+$ . **B)** Time course of inside-out patch  
 54 clamp recording in HEK293T expressing TRPM3 $\alpha$ 1 in presence of Clt (10  $\mu$ M). Mean current  
 55 increase in TRPM3 $\alpha$ 1 after stimulation by Clt ( $\Delta I_{+80\text{mV}}$ :  $67.3 \pm 23.7$  pA;  $\Delta I_{-80\text{mV}}$ :  $-58.9 \pm 20.3$   
 56 pA) (n=8).

57

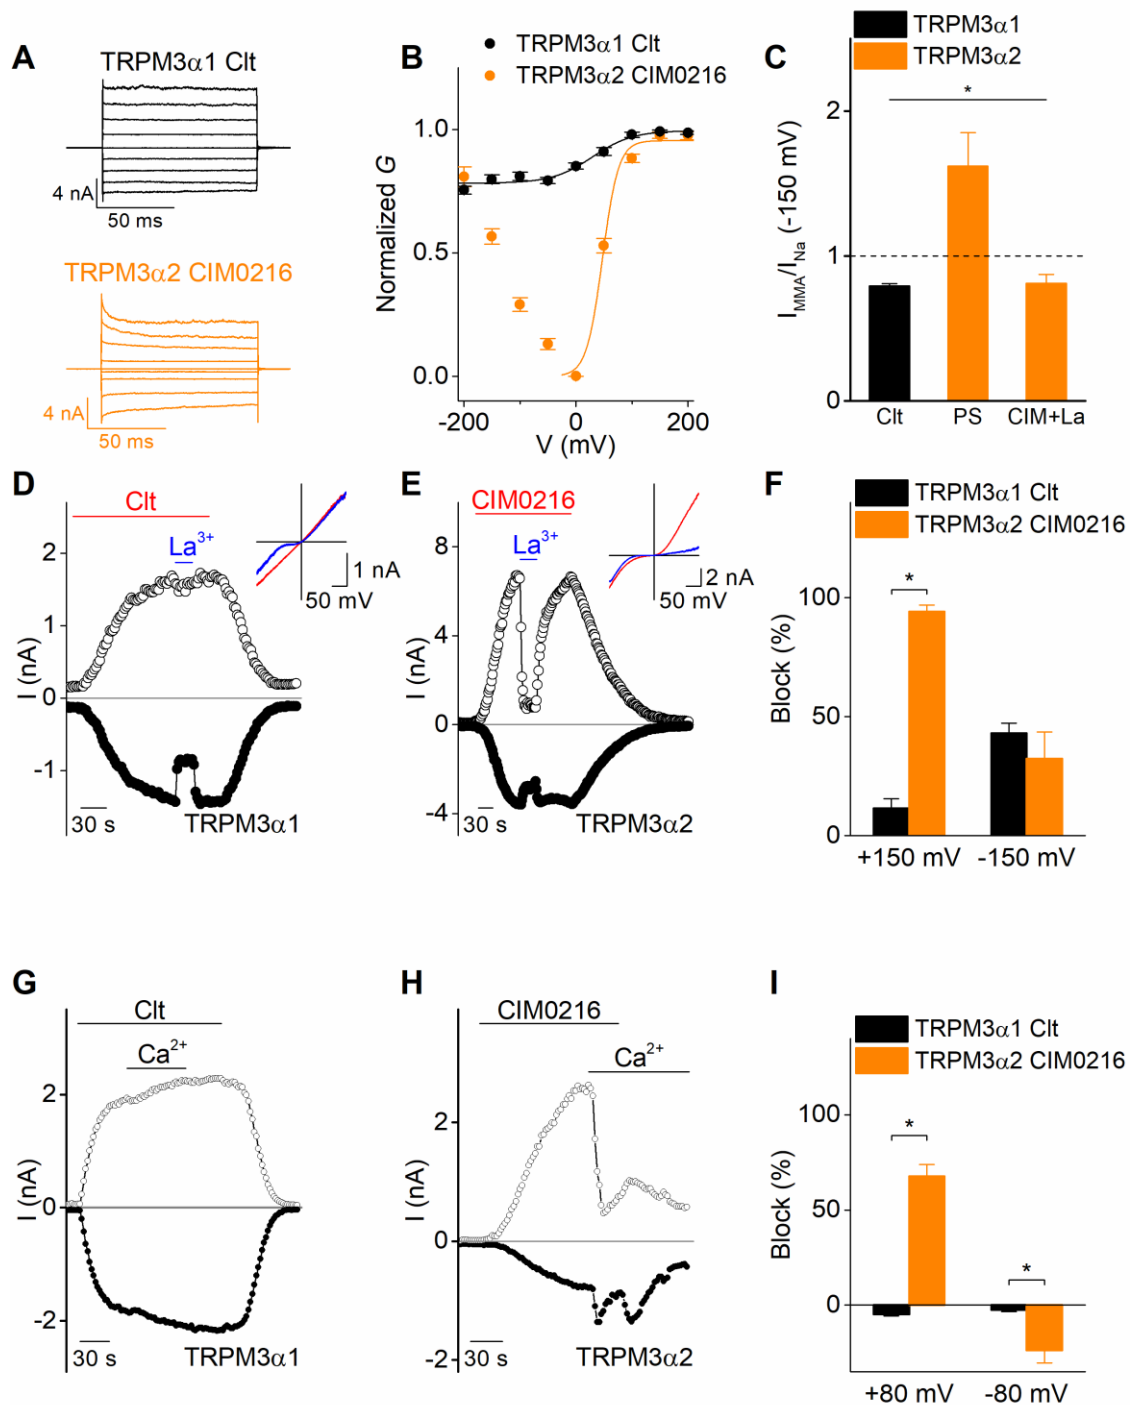

58

59 **FIGURE S6**

60 **A)** Current traces obtained with a step protocol ranging from -200 mV to +200 mV in +50 mV  
 61 steps for HEK293T cells transiently transfected with TRPM3 $\alpha$ 1 (black, upper panel) or stably  
 62 transfected with TRPM3 $\alpha$ 2 (orange, lower panel). **B)** Normalized G-V relation for TRPM3 $\alpha$ 1  
 63 CIt-induced and TRPM3 $\alpha$ 2 CIM0216-induced currents obtained from current traces as in A),

64 n = 6 for both conditions. **C)** Relative currents at -150 mV carried by monomethylammonium  
65 (MMA<sup>+</sup>) for TRPM3 $\alpha$ 1 Clt-induced currents (black) and TRPM3 $\alpha$ 2 PS-induced currents and  
66 CIM0216-induced currents in the presence of Lanthanum (La<sup>3+</sup>, orange). MMA<sup>+</sup> currents were  
67 normalized to the currents carried by Na<sup>+</sup>; PS (40  $\mu$ M), Clt (10  $\mu$ M), CIM0216 (1  $\mu$ M) and La<sup>3+</sup>  
68 (100  $\mu$ M), n = 5 for all conditions. \* < 0.05, One-way ANOVA. **D and E)** Time course of whole-  
69 cell patch clamp recordings showing the effect of La<sup>3+</sup> on TRPM3 $\alpha$ 1 Clt-induced currents *D)*  
70 and TRPM3 $\alpha$ 2 CIM0216-induced currents *E)*. **F)** Percentage of La<sup>3+</sup>-induced block for  
71 experiments as in *D)* and *E)* for n = 6 cells for each experiment. \* < 0.05 with students two-  
72 tailed unpaired t-test. **G and H)** Time course of whole-cell patch clamp recordings showing  
73 the effect of calcium on TRPM3 $\alpha$ 1 Clt-induced currents *G)* and TRPM3 $\alpha$ 2 CIM0216-induced  
74 currents *H)*. **I)** Percentage (%) of calcium-induced block for experiments as in *G)* and *H)* for n  
75 = 5 cells. \* < 0.05 with Mann-Whitney test.  
76



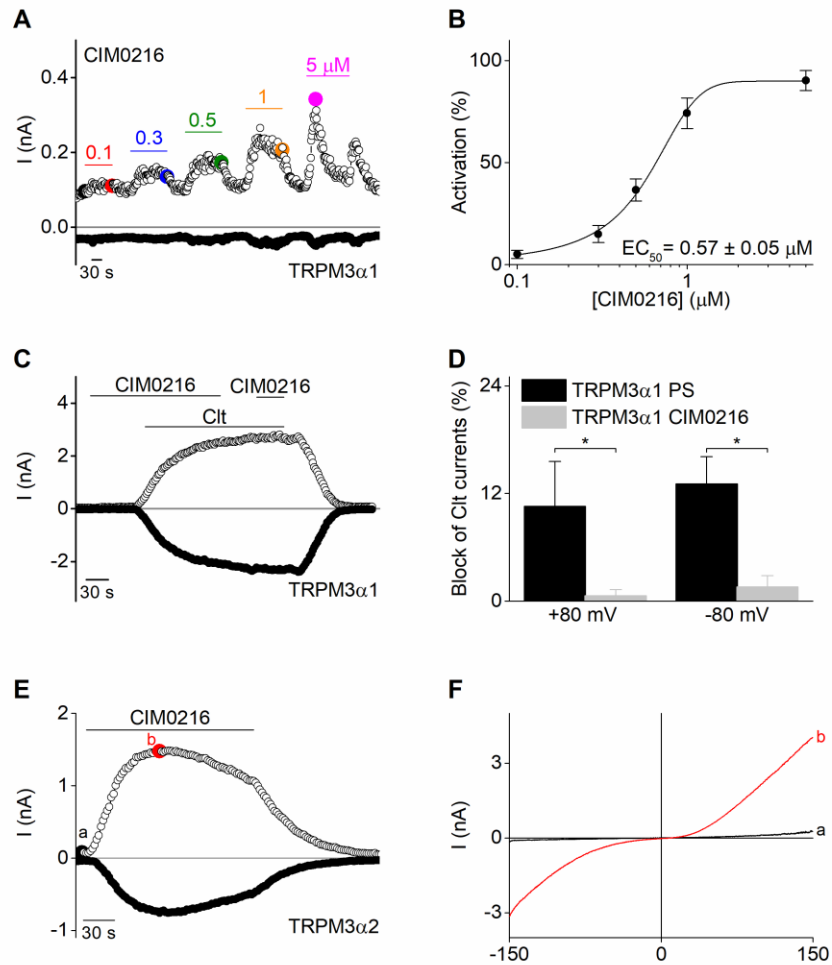

77

78 **FIGURE S7**

79 **A)** Time course of whole-cell patch clamp recording at  $\pm 80$  mV in HEK293T cells transiently  
80 expressing TRPM3 $\alpha$ 1 upon application of different concentrations of CIM0216 (in  $\mu$ M). **B)**  
81 Concentration-response curve for CIM0216 on TRPM3 $\alpha$ 1 extracted from experiments as in A)  
82 for  $n = 9$  cells. **C)** Time course of whole-cell patch clamp recording at  $\pm 80$  mV in HEK293T cells  
83 transiently expressing TRPM3 $\alpha$ 1 upon co-application of CIM0216 and Clt. **D)** Statistics of the  
84 inhibiting effects of PS and CIM0216 on Clt-induced TRPM3 $\alpha$ 1 currents for  $n = 5$  cells per  
85 treatment. **E)** Time course of whole-cell patch clamp recording at  $\pm 80$  mV in HEK293T cells  
86 stably expressing TRPM3 $\alpha$ 2 upon application of CIM0216 (1  $\mu$ M). **F)** *I-V* traces for time points  
87 indicated in E).

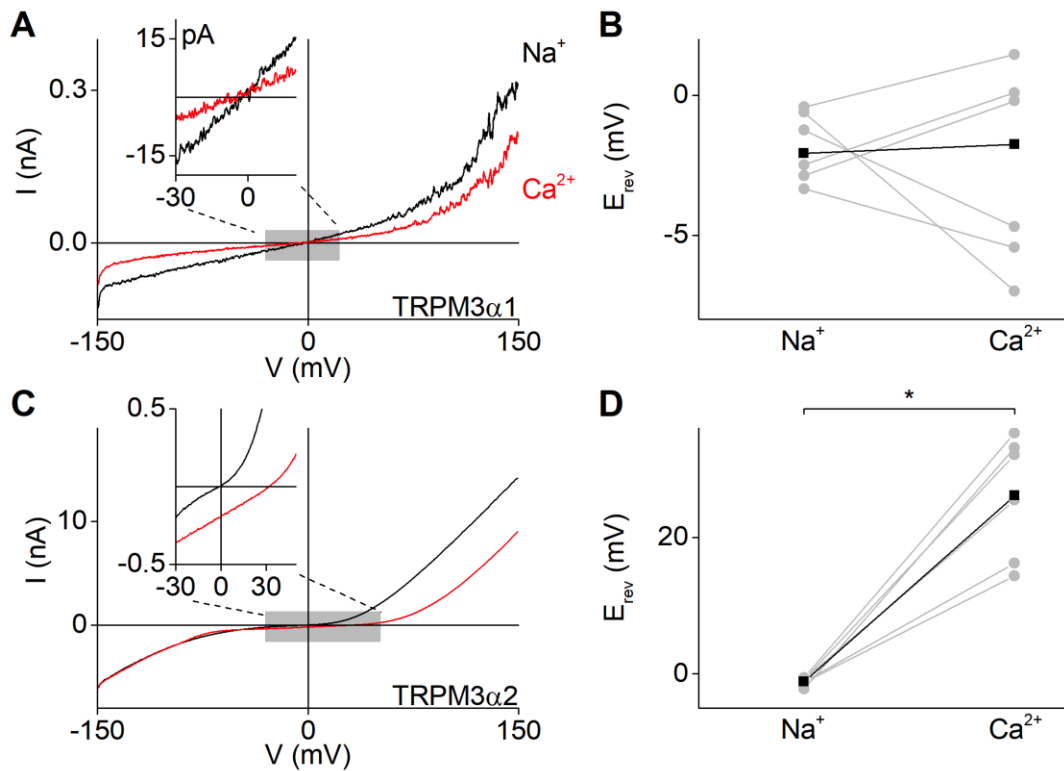

88

89 **FIGURE S8**

90 **A)** *I-V* Traces of whole-cell patch clamp recording in HEK293 cells transiently expressing  
 91 TRPM3α1 upon application of CIM0216 (1 μM) in standard extracellular solution (black) and  
 92 in 100 mM extracellular Ca<sup>2+</sup> (red trace). **B)** Reversal potentials of n = 6 individual cells  
 93 measured in A) in 150 mM extracellular Na<sup>+</sup> and 100 mM extracellular Ca<sup>2+</sup>, mean values  
 94 represented in black squares. **C)** As in panel A) but for TRPM3α2. **D)** Reversal potentials of n  
 95 = 6 individual cells (grey circles) measured in C) in 150 mM extracellular Na<sup>+</sup> and 100 mM  
 96 extracellular Ca<sup>2+</sup>; mean values represented in black squares. \* < 0.05 with student two-tailed  
 97 unpaired t-test.

98

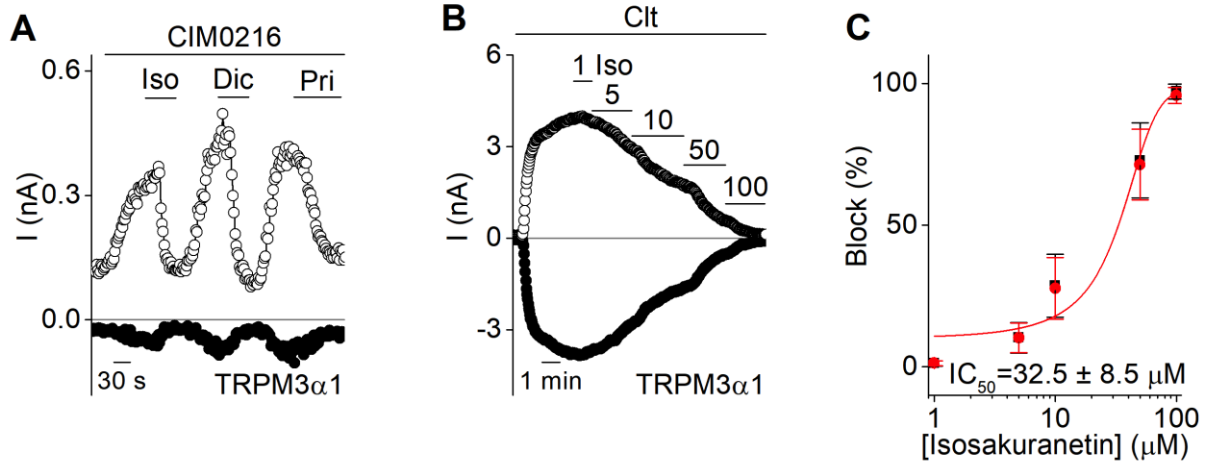

99

100 **FIGURE S9**

101 **A)** Time course of whole-cell patch clamp recording at  $\pm$  80 mV in HEK293T cells transiently  
 102 expressing TRPM3 $\alpha$ 1 upon application of CIM0216 (1  $\mu$ M) and the TRPM3 antagonists  
 103 isosakuranetin (Iso; 5  $\mu$ M), diclofenac (Dic; 100  $\mu$ M) and primidone (Pri; 25  $\mu$ M). **B)** Time  
 104 course of whole-cell patch clamp recording at  $\pm$  80 mV in HEK293T cells transiently expressing  
 105 TRPM3 $\alpha$ 1 upon application of different concentrations of Isosakuranetin (1 - 100  $\mu$ M) during  
 106 CIt-treatment (10  $\mu$ M). **C)** Concentration-response curve for Isosakuranetin on TRPM3 $\alpha$ 1 at  
 107 +80 mV (red) and -80 mV (black trace) extracted from experiments shown in *B*) (n = 4).

108

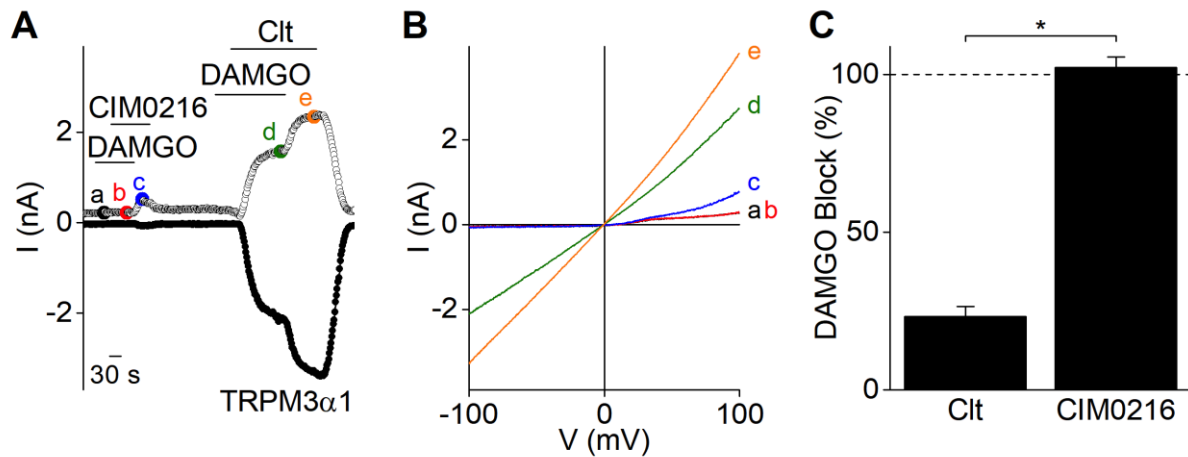

110

111 **FIGURE S10**

112 **A)** Time course of whole-cell patch clamp recording at  $\pm 80$  mV in HEK293T cells co-expressing  
 113 TRPM3 $\alpha$ 1 and  $\mu$ -opioid receptors upon application of DAMGO (1  $\mu$ M), CIM0216 (5  $\mu$ M) and  
 114 Clt (10  $\mu$ M). **B)** *I-V* Traces for time points indicated in **A**). **C)** Percentage of block induced by  
 115 DAMGO in experimental conditions of panel **A**) ( $n = 8$ ). \*  $< 0.05$  with student two-tailed  
 116 unpaired t-test.

117

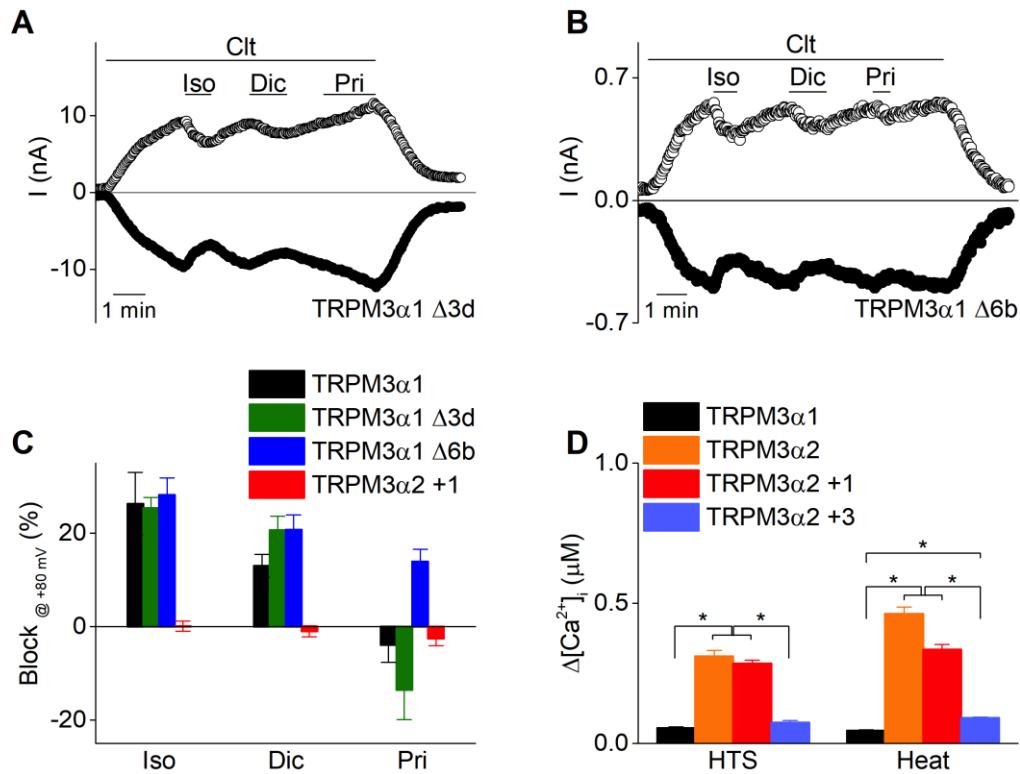

118

119 **FIGURE S11**

120 **A)** Time course of a whole-cell patch clamp recording at  $\pm 80$  mV in HEK293T cells transiently  
 121 expressing deletion mutant TRPM3 $\alpha$ 1  $\Delta$ 3d upon application of Clt (10  $\mu$ M) and different  
 122 TRPM3 antagonists (isosakuranetin (Iso; 5  $\mu$ M), diclofenac (Dic; 100  $\mu$ M), primidone (Pri; 25  
 123  $\mu$ M)). **B)** As in A) but for the deletion mutant TRPM3 $\alpha$ 1  $\Delta$ 6b. **C)** Percentage of block calculated  
 124 from experiments in A) and B) and compared to results of TRPM3 $\alpha$ 1 and insertion mutant  
 125 TRPM3 $\alpha$ 2 +1; n = 5 for TRPM3 $\alpha$ 1, n = 3 for TRPM3 $\alpha$ 1  $\Delta$ 3d, n = 4 for TRPM3 $\alpha$ 1  $\Delta$ 6b and n = 6  
 126 for TRPM3 $\alpha$ 2 +1. **D)** Statistics of calcium increases induced by hypotonicity (HTS) and heat in  
 127 HEK293T cells transfected with TRPM3 $\alpha$ 1, TRPM3 $\alpha$ 2 or the mutant channels TRPM3 $\alpha$ 2 +1  
 128 and TRPM3 $\alpha$ 2 +3. For HTS: n = 678 for TRPM3 $\alpha$ 1, n = 547 for TRPM3 $\alpha$ 2, n = 539 for TRPM3 $\alpha$ 2  
 129 +1 and n = 788 for TRPM3 $\alpha$ 2 +3. For heat: n = 484 for TRPM3 $\alpha$ 1, n = 651 for TRPM3 $\alpha$ 2, n =  
 130 751 for TRPM3 $\alpha$ 2 +1, n = 487 for TRPM3 $\alpha$ 2 +3. N = 3 independent recordings for each  
 131 experiment. \* < 0.05, Kruskal-Wallis ANOVA with Dunn's posthoc test.
